# Supplementary material for: Photothermal therapy of papillary thyroid cancer tumor xenografts with targeted thyroid stimulating hormone receptor antibody functionalized multiwalled carbon nanotubes
Source: Springer Nature journal article supplement (doi:10.1186/s12645-023-00184-9), 2023-04-05
Supplement: 12645_2023_184_MOESM1_ESM.pdf [file 12645_2023_184_MOESM1_ESM.pdf]

## Supplemental Data 1 – Thermal Modeling

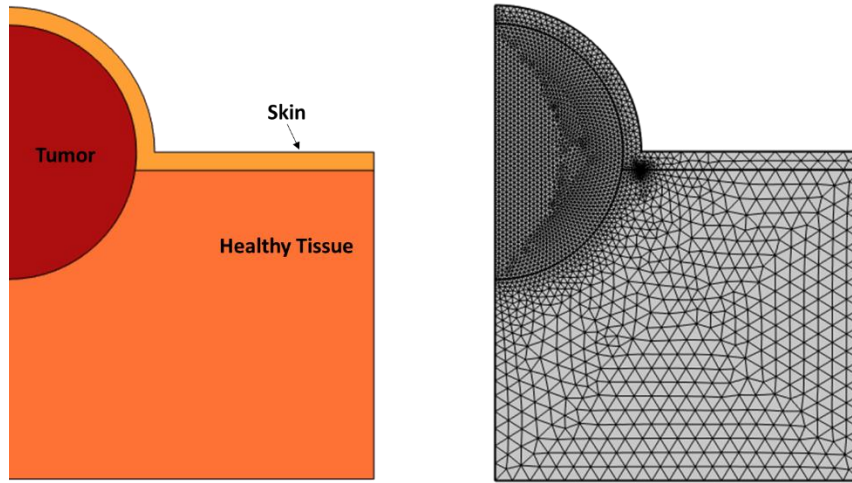

2D modeling of the tumor. For the modeling of the tumor, a 2D axisymmetric physical model for spherical tumors surrounded by an adjacent healthy tissue and skin from the above in a cylindrical form was assumed. The physical dimensions are set as 0.5mm of thickness and 10 mm in length for skin above the tumor, 7 mm as the diameter of the tumor and 8 mm of thickness and 10 mm of length for healthy tissue. It was assumed that the physical model's top surface is illuminated by a collimated Gaussian laser beam.

The Bioheat equation (**Eq.1**)(1) is defined as the follows: first, the left-hand term  $\rho C_p \frac{\partial T}{\partial t}$  represent the rate of energy storage, where  $\rho$  is the tissue density [ $\text{kg}/\text{m}^3$ ],  $C_p$  is the tissue specific heat [ $\text{J}/(\text{kg}\cdot\text{K})$ ] and  $t$  is the time [ $\text{s}$ ]. The first term on the right-hand side,  $\nabla(k\nabla T)$ , is the loss of thermal energy due to conduction, where  $T$  is the temperature and  $k$  is the tissue thermal conductivity [ $\text{W}/\text{m}\cdot\text{K}$ ].  $\rho_b C_b \omega_b (T_b - T)$  is the approximate local loss of energy due to the blood flow in capillaries, where  $\rho_b$  is the blood density [ $\text{kg}/\text{m}^3$ ],  $C_b$  is the blood specific heat [ $\text{J}/(\text{kg}\cdot\text{K})$ ],  $\omega_b$  is the blood perfusion rate [ $1/\text{s}$ ] and  $T_b$  is the arterial blood temperatures [K]. Lastly, the terms  $Q_{met}, Q_{laser}$  represent the metabolic heat generation rate [ $\text{W}/\text{m}^3$ ] and the external laser source

[W/m<sup>3</sup>], respectively. The parameters used for the Bioheat transfer equation is listed in **Table S1**, and the thermal properties of the various tissues are listed in **Table S2**.

**Eq. 1**

$$\rho C_p \frac{\partial T}{\partial t} = \nabla(k\nabla T) + \rho_b C_b \omega_b (T_b - T) + Q_{met} + Q_{laser}$$

**Eq. 2** was used to define the boundary between the tumor surface and the surrounding environment, where  $n$  is the unit vector normal to the surface,  $h$  is the heat transfer coefficient [Wm<sup>-2</sup>K<sup>-1</sup>],  $T_{ext}$  is the temperature boundary, and  $T$  is the ambient temperature environment at 20 °C. The term on the right side of this equation describes the heat losses due to convection.

**Eq. 2**

$$-n \cdot (-k\nabla T) = h \cdot (T_{ext} - T)$$

Next, the optical properties of the laser parameters, the carbon nanotubes and tissues are defined. The laser used was a continuous laser with an assumed Gaussian beam shape defined in cylindrical coordinate as follows:

**Eq. 3**

$$Q_{laser}(r, z) = \frac{-\partial I(r, z)}{\partial z} = \mu_a I_o (1 - R) \exp[-(\mu_a + \mu_s)z] \exp\left[-\frac{2r^2}{w(z)^2}\right]$$

where  $\frac{-\partial I(r, z)}{\partial z}$  is the intensity attenuated through tissue depth in the - z-direction,  $I_o$  is the incident

laser power density,  $w(z) = w_o \sqrt{1 + \left(\frac{z}{z_r}\right)^2}$  is the beam radius that depends upon the position in

the - z-direction,  $z_R = \frac{\pi w_0^2}{\lambda}$  is the Rayleigh length with the parameter  $w_0$  define as the beam waist and  $\lambda$  is the wavelength of the laser. The parameter  $R$  is the spectral reflectivity at the air-tissue interface, defined as  $R = \left(\frac{n_1 - n_2}{n_1 + n_2}\right)^2$  where  $n_1$  and  $n_2$  are defined as the refractive index of tissue and air, respectively. The laser source parameters used to calculate the laser properties are listed in **Table S3**.

The optical properties of carbon nanotubes within the tissue volume are defined as  $\mu_a$  and  $\mu_s$ . The parameter  $\mu_a = \mu_{am} + \mu_{an}$  represents the absorption coefficient, where the terms  $\mu_{am}$  and  $\mu_{an}$  are the absorption coefficient for the mouse tissue and the absorption coefficient for the MWCNTs, respectively. The parameter  $\mu_s = \mu_{sm} + \mu_{sn}$  represents the scattering coefficient, where the terms  $\mu_{sm}$  and  $\mu_{sn}$  are the scattering coefficient for the mouse tissue and for the MWCNTs, respectively. Thus, the scattering coefficient for the tissue is defined as  $\mu_{sm} = (1 - g)\mu_s$ . The quantities  $\mu_{an}$  and  $\mu_{sn}$  are calculated as follows:

**Eq. 4**

$$\mu_{an} = f_v \frac{3 Q_a}{4 r_{eff}}$$

**Eq. 5**

$$\mu_{sn} = f_v \frac{3 Q_s}{4 r_{eff}}$$

Where  $r_{eff} = \left(\frac{3V}{4\pi}\right)^{1/3}$  is the effective radius of the CNTs,  $f_v$  is volume fraction and  $Q_s$  is the dimensionless scattering efficiency factor for a single CNT. The nanoparticle distribution within the tumor region is assumed intravenously injected, and as such 0.9% of the injected CNTs were

assumed to accumulate at the tumor(2). Therefore, the volume fraction of nanoparticles, introduced and proposed by Dombrovsky *et al.*(3), will be used to link the amount of radiant energy penetration in the tissue. The list of optical properties of the different tissues are listed in **Table S4**.(4)

**Table S1.** Parameters used for the Bioheat transfer equation.

| <b>Parameters</b>             | <b>Values</b>         | <b>Units</b>         |
|-------------------------------|-----------------------|----------------------|
| Heat transfer coefficient $h$ | 10                    | [W/m <sup>2</sup> K] |
| Reflectivity $R$              | 0.027                 | -                    |
| Temperature body              | 36.6                  | [°C]                 |
| Ambient temperature           | 20                    | [°C]                 |
| Volume fraction $f_v$         | $6.63 \times 10^{-7}$ | -                    |

**Table S2.** Thermal properties of the tumor, the healthy tissue and skin(4-7).

| <b>Parameters</b>                   | <b>Skin<br/>(animal)</b> | <b>Fat<br/>(animal)</b> | <b>Thyroid<br/>Gland<br/>(human)</b> | <b>Bakground<br/>tissues<br/>(human)</b> | <b>Thyroid<br/>tumor<br/>(human)</b> | <b>Blood</b> | <b>Units</b>         |
|-------------------------------------|--------------------------|-------------------------|--------------------------------------|------------------------------------------|--------------------------------------|--------------|----------------------|
| Density $\rho$                      | 1180                     | 1000                    | 1050                                 | 1090                                     | 1000                                 | 1060         | [kg/m <sup>3</sup> ] |
| Specific heat<br>$C$                | 2291                     | 4200                    | 3609                                 | 4181.3                                   | 4180.3                               | 3800         | [J/kg K]             |
| Thermal<br>conductivity<br>$\kappa$ | 0.58                     | 0.561                   | 0.52                                 | 1.1                                      | 1.1                                  | -            | [W/mK]               |
| Blood<br>perfusion $\omega$         | 0.0005                   | 0.0036                  | 0.0036                               | 0.0036                                   | 0.0036                               | -            | [s <sup>-1</sup> ]   |
| Metabolic<br>heat $Q_{met}$         | 420                      | 420                     | 420                                  | 420                                      | 420                                  | -            | [W/m <sup>3</sup> ]  |

**Table S3.** Laser source parameters for the Bioheat transfer equation.

| <b>Parameters</b>    | <b>Values</b> | <b>Units</b> |
|----------------------|---------------|--------------|
| Beam diameter $w_o$  | 4.5           | [mm]         |
| Laser power output   | 4.5           | [W]          |
| Wavelength $\lambda$ | 808           | [nm]         |

**Table S4.** Optical properties of the tumor, the healthy tissue and skin at 808 nm(4-7).

| <b>Parameters</b> | <b>Skin<br/>(animal)</b> | <b>Fat<br/>(animal)</b> | <b>Thyroid<br/>Gland<br/>(human)</b> | <b>Background<br/>tissues<br/>(human)</b> | <b>Thyroid<br/>tumor<br/>(human)</b> | <b>Calculated<br/>MWCNTs<br/>within the<br/>tumor site</b> | <b>Units</b> |
|-------------------|--------------------------|-------------------------|--------------------------------------|-------------------------------------------|--------------------------------------|------------------------------------------------------------|--------------|
| Abso.<br>Coeff.   | 19                       | 6.5                     | 3                                    | 3                                         | 3                                    | 64                                                         | [1/m]        |
| Scatt.<br>Coeff.  | 834                      | 1000                    | 800                                  | 800                                       | 800                                  | 182                                                        | [1/m]        |
| Anisotropy        | 0.775                    | 0.775                   | 0.9                                  | 0.9                                       | 0.9                                  | -                                                          | -            |

## References

1. Pennes HH. Analysis of tissue and arterial blood temperatures in the resting human forearm. *J Appl Physiol*. 1948;1(2):93-122.
2. Wilhelm S, Tavares AJ, Dai Q, Ohta S, Audet J, Dvorak HF, et al. Analysis of nanoparticle delivery to tumours. *Nature Reviews Materials*. 2016;1(5):16014.
3. Dombrovsky LA, Timchenko V, Jackson M, Yeoh GH. A combined transient thermal model for laser hyperthermia of tumors with embedded gold nanoshells. *International Journal of Heat and Mass Transfer*. 2011;54(25-26):5459-69.
4. Okebiorun MO, ElGohary SH. Optothermal tissue response for laser-based investigation of thyroid cancer. *Informatics in Medicine Unlocked*. 2020;18:100285.
5. Beik J, Asadi M, Khoei S, Laurent S, Abed Z, Mirrahimi M, et al. Simulation-guided photothermal therapy using MRI-traceable iron oxide-gold nanoparticle. *J Photochem Photobiol B*. 2019;199:111599.
6. Xu Y, Long S, Yang Y, Zhou F, Dong N, Yan K, et al. Mathematical simulation of temperature distribution in tumor tissue and surrounding healthy tissue treated by laser combined with indocyanine green. *Theor Biol Med Model*. 2019;16(1):12.
7. Manuchehrabadi N, Chen Y, Lebrun A, Ma R, Zhu L. Computational simulation of temperature elevations in tumors using Monte Carlo method and comparison to experimental measurements in laser photothermal therapy. *J Biomech Eng*. 2013;135(12):121007.
