# Supplementary material for: Photothermal therapy of papillary thyroid cancer tumor xenografts with targeted thyroid stimulating hormone receptor antibody functionalized multiwalled carbon nanotubes
Source: Springer Nature journal article supplement (doi:10.1186/s12645-023-00184-9), 2023-04-05
Supplement: 12645_2023_184_MOESM2_ESM.pdf [file 12645_2023_184_MOESM2_ESM.pdf]

**A**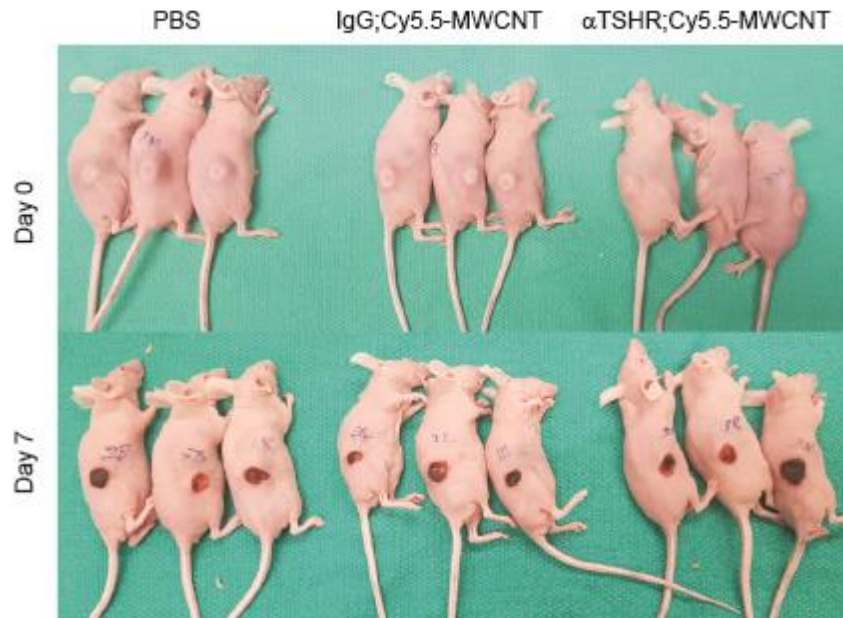**B**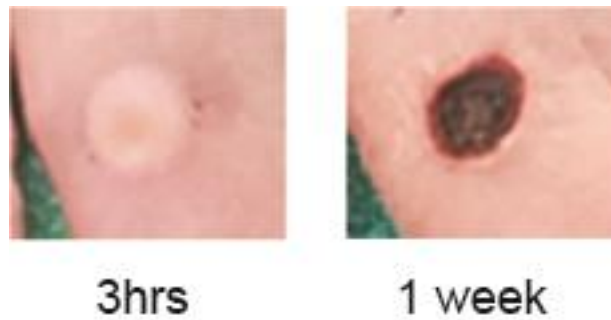**C**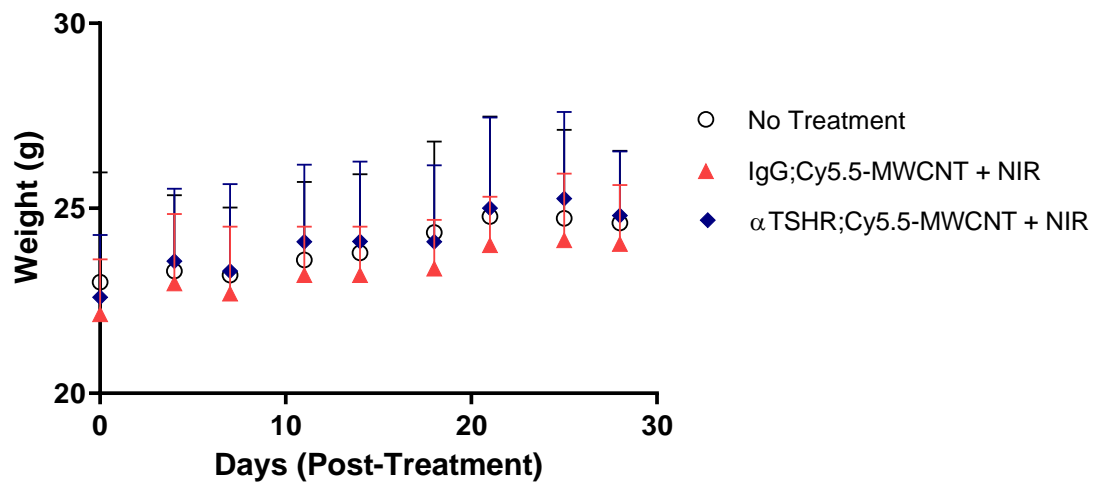

**Supplemental Data 2. Eschar formation following tumor ablation and monitoring of adverse events.** **A.** Assessment of dermal eschar formation Day 0 and at 1 week following exposure with 4.5 W of total laser power, of the different treatment cohorts. **B.** Zoom in of eschar. **C.** Monitoring of animal body weight 28 days post laser treatment. No significant differences were observed between untreated animals vs. treatment cohorts..
