# Supplementary material for: Photothermal therapy of papillary thyroid cancer tumor xenografts with targeted thyroid stimulating hormone receptor antibody functionalized multiwalled carbon nanotubes
Source: Springer Nature journal article supplement (doi:10.1186/s12645-023-00184-9), 2023-04-05
Supplement: 12645_2023_184_MOESM3_ESM.pdf [file 12645_2023_184_MOESM3_ESM.pdf]

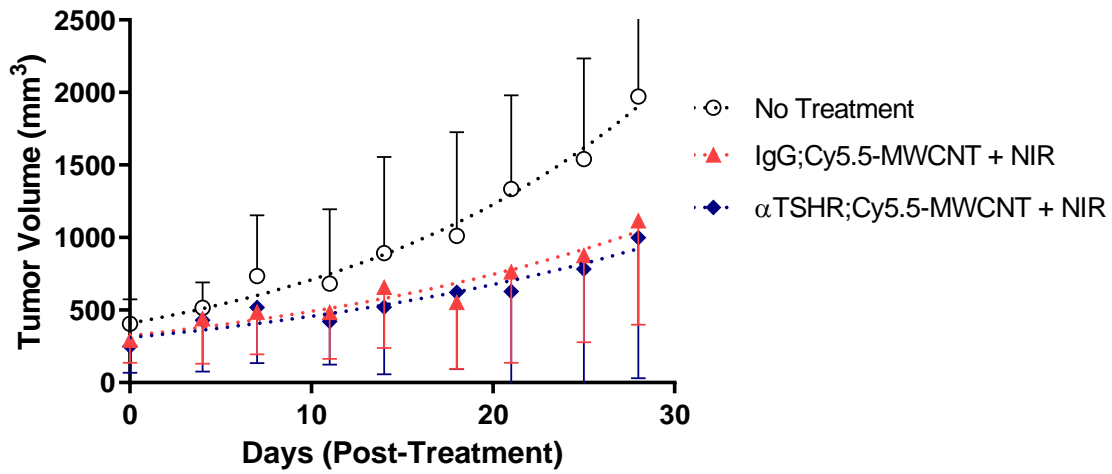

**Supplemental Data 3. Photothermal ablation of BCPAP tumors with using 2W, 808nm wavelength continuous laser for 2 minutes.** Although those that were injected with IgG; and αTSHR;Cy5.5-MWCNT saw decreased tumor size compared to the no treatment group ( $p = 0.007$  for both), the tumor ablation was insufficient and the growth was continued.
